# Supplementary material
Source: publisher figshare collection journal article supplement (https://acs.figshare.com/ndownloader/files/4060996)

**Figure S1.** Differential protein expression between individuals. Aggregate expression values were plotted for exemplary proteins quantified by proteomic analysis of BALF. Proteins that were highest in the LPS-exposed lobes included (A) matrix metalloproteinase 9 (MMP9), (B) peptidoglycan recognition protein 1 (PGRP1), (C) myeloperoxidase (MPO) and (D-F) subunits of the inter-alpha-trypsin inhibitor complex. Proteins that were high in HDM lobes included (G) pulmonary surfactant protein A1 (SFTA1), (H) cathepsin H (CATH) and (I) annexin A3 (ANXA3). Proteins that were high in SAL lobes included (J) bactericidal/permeability-increasing protein-like 1 (BPIL1), (K) C6orf58 and (L) long palate, lung, and nasal epithelium clone 1 (LPLC1). Proteins that differentiated the three subjects included (M) aldehyde dehydrogenase (ALDH3A1), (N) phosphatidylethanolamine-binding protein 4 (PEBP4), (O) Fetuin B and (P) histidine-rich glycoprotein (HRG). Data are mean  $\pm$  s.e.m. (n=3 technical replicates).

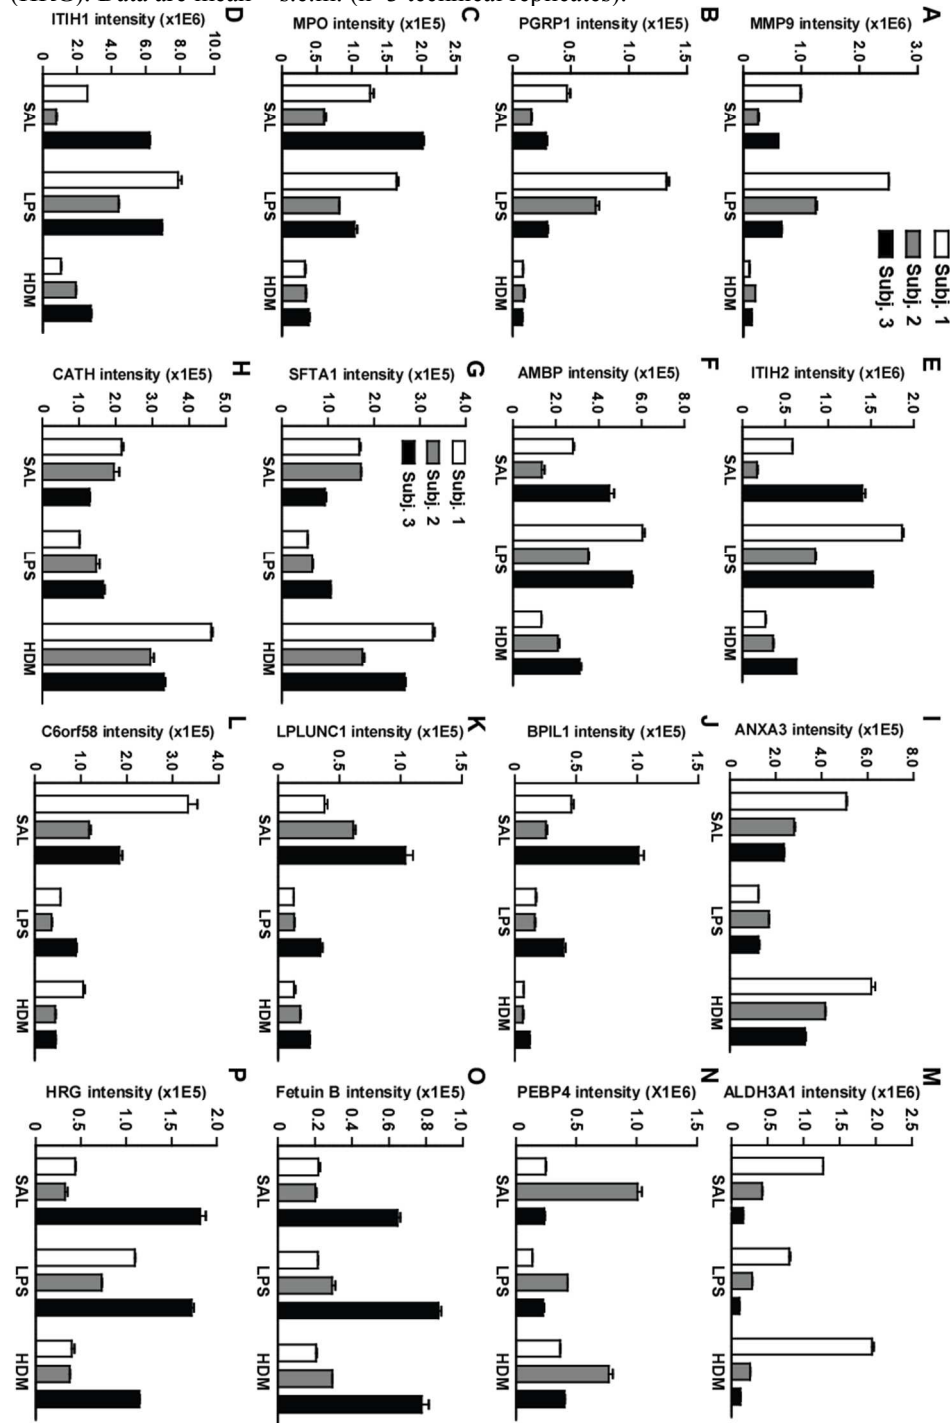

Supplement: Supplementary file 1 [file 4060996]
